# Supplementary material for: p-21 Activated Kinase as a Molecular Target for Chemoprevention in Diabetes
Source: Preprints.org preprint supplement (doi:10.20944/preprints201808.0403.v1), 2018-08-23
Supplement: Supplementary file 1 [file supplementary]

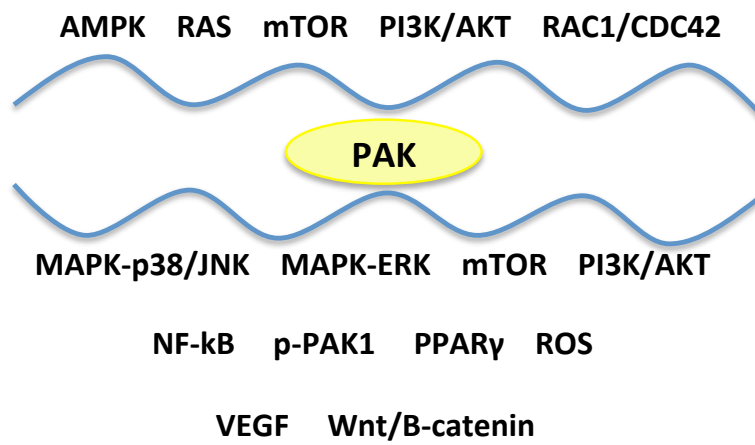

**Supplementary Figure 1. Role of signaling pathways upstream and downstream of p-21 activated kinases.**
